# Supplementary material for: Burnout levels among Portuguese family doctors: a nationwide survey
Source: PubMed Central journal article supplement — BMJ Open. 2012 Jun 18;2(3):e001050. doi: 10.1136/bmjopen-2012-001050 (PMC3378936; doi:10.1136/bmjopen-2012-001050), 2012-06-18
Supplement: bmjopen-2012-001050.draft_revisions.pdf [file bmjopen-2012-001050.draft_revisions.pdf]

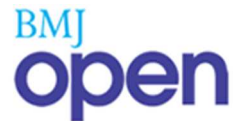

**BURNED-OUT BUT PROUD PORTUGUESE FAMILY DOCTORS:  
A CROSS-SECTIONAL SURVEY**

|                                 |                                                                                                                                                                                                                                                                                                                                                                                                                                                                                                                                                          |
|---------------------------------|----------------------------------------------------------------------------------------------------------------------------------------------------------------------------------------------------------------------------------------------------------------------------------------------------------------------------------------------------------------------------------------------------------------------------------------------------------------------------------------------------------------------------------------------------------|
| Journal:                        | <i>BMJ Open</i>                                                                                                                                                                                                                                                                                                                                                                                                                                                                                                                                          |
| Manuscript ID:                  | bmjopen-2012-001050                                                                                                                                                                                                                                                                                                                                                                                                                                                                                                                                      |
| Article Type:                   | Research                                                                                                                                                                                                                                                                                                                                                                                                                                                                                                                                                 |
| Date Submitted by the Author:   | 20-Feb-2012                                                                                                                                                                                                                                                                                                                                                                                                                                                                                                                                              |
| Complete List of Authors:       | Marcelino, Gisela; Medical Faculty of Lisbon, University of Lisbon, Cerveira, João Miguel; Medical Faculty of Lisbon, University of Lisbon, Carvalho, Inês; Medical Faculty of Lisbon, University of Lisbon, Costa, João; Medical Faculty of Lisbon, University of Lisbon, Lopes, Marta; Medical Faculty of Lisbon, University of Lisbon, Calado, Nelson; Alvalade Health Center, Av. do Brasil, 53, Pavilhão 33, Parque de Saúde de Lisboa, Marques-Vidal, Pedro; Institute of Social and Preventive Medicine (IUMSP), University Hospital of Lausanne, |
| <b>Primary Subject Heading</b>: | General practice / Family practice                                                                                                                                                                                                                                                                                                                                                                                                                                                                                                                       |
| Secondary Subject Heading:      | Occupational and environmental medicine, Public health                                                                                                                                                                                                                                                                                                                                                                                                                                                                                                   |
| Keywords:                       | Quality in health care < HEALTH SERVICES ADMINISTRATION & MANAGEMENT, PREVENTIVE MEDICINE, PRIMARY CARE                                                                                                                                                                                                                                                                                                                                                                                                                                                  |
|                                 |                                                                                                                                                                                                                                                                                                                                                                                                                                                                                                                                                          |

SCHOLARONE™  
Manuscripts

Only

# BURNED-OUT BUT PROUD PORTUGUESE FAMILY DOCTORS

## A CROSS-SECTIONAL SURVEY

**Short title:** Burnout in Portuguese Family Doctors

Gisela Marcelino\*<sup>1</sup>; João Melich-Cerveira\*<sup>1</sup>; Inês Carvalho<sup>1</sup>; João Azeredo Costa<sup>1</sup>;  
Marta Lopes<sup>1</sup>; Nelson Calado<sup>2</sup> and Pedro Marques-Vidal<sup>3,4</sup>

<sup>1</sup> Medical Faculty of Lisbon, University of Lisbon, Avenida Professor Egas Moniz, 1649-028 Lisbon, Portugal; <sup>2</sup> Alvalade Health Center, Av. do Brasil, 53, Pavilhão 33, Parque de Saúde de Lisboa, Lisbon, Portugal; <sup>3</sup> Institute of Social and Preventive Medicine (IUMSP), University Hospital of Lausanne, Route de la Corniche 2, 1066 Epalinges, Switzerland;

\* Both authors contributed equally

### Emails of authors:

Gisela Marcelino (GM): giselamarcelino@sapo.pt

João Melich-Cerveira (JMC): joao\_cerveira86@hotmail.com

Inês Carvalho (IC): inesdcarvalho@gmail.com

João Azeredo Costa (JAC): j.azeredo.costa@gmail.com

Marta Lopes (ML): msclopes13@gmail.com

Nelson Calado (NC): caladonelson@yahoo.com.br

Pedro Marques-Vidal (PMV): pedro-manuel.marques-vidal@chuv.ch

### Address for reprints and correspondence

Gisela Marcelino

Praça Artur Portela

2, 1º esquerdo

1500-061, Lisboa

Tel: + 351969911416

E-mail: giselamarcelino@sapo.pt

We state that Gisela Marcelino and João Melich-Cerveira, having contributed equally, were responsible for the conception, design, and acquisition of data. They both

1  
2  
3 worked statistically the data, and wrote the article. We also state that Pedro Marques-  
4 Vidal was the tutor of this research study and wrote part of the article. Inês Carvalho,  
5 João Azeredo Costa and Marta Lopes helped with the acquisition of data and, along  
6 with Nelson Calado, scientifically reviewed the paper and made major modifications  
7 regarding intellectual content. All authors have given their final approval of the version  
8 to be submitted.  
9

10  
11  
12 We state that there is no conflict of interest for all authors.  
13

14  
15 We state that that the manuscript, including related data, figures and tables have not  
16 been previously published, that the manuscript is not under consideration elsewhere,  
17 and that there is no additional data available.  
18  
19

20  
21 We also state that this study did not receive any funding, and that it was approved by  
22 the Ethics Commissions of North, Algarve, and Madeira, and also by all Portuguese  
23 Regional Administrations.  
24  
25

26  
27 I, Gisela Marcelino, "the Corresponding Author has the right to grant on behalf of all  
28 authors and does grant on behalf of all authors, an exclusive licence (or non exclusive  
29 for government employees) on a worldwide basis to the BMJ Publishing Group Ltd and  
30 its Licensees to permit this article (if accepted) to be published in BMJ editions and any  
31 other BMJ PGL products and sublicences to exploit all subsidiary rights, as set out in the  
32 licence ([http://resources.bmj.com/bmj/authors/checklists-forms/licence-for-](http://resources.bmj.com/bmj/authors/checklists-forms/licence-for-publication)  
33 publication)."  
34  
35  
36  
37  
38  
39  
40  
41  
42

43 **Abstract + main text: 1881**

44  
45  
46 **Number of tables: 3**

**Number of figures: 1**

**Number of references: 17**

**Abstract**

**Aim:** To characterize the prevalence of burnout syndrome (BS) in a sample of FDs working in the Portuguese National Health System.

**Design:** Cross-sectional survey.

**Setting:** Primary Health Care Centers (HCC) from the 18 continental districts and 2 archipelagos of Portugal.

**Method:** The Portuguese version of the Maslach Burnout Inventory–Human Services Survey (MBI–HSS) was sent to 40 randomly selected health-care centers (HCC) and distributed to the FDs employed. Socio-demographic and work-related data was also collected. Participants were classified as having high, average or low levels of emotional exhaustion (EE), depersonalization (DP) and personal accomplishment (PA) dimensions of burnout.

**Results:** 371 questionnaires were sent, of which 153 (83 women, age range 29-64 years; response rate 41%) returned. One quarter (25.3%) of FDs scored high for emotional exhaustion (EE), 10.0% for depersonalization (DP) and 12.0% for lack of personal accomplishment (PA). In comparison with women, men scored higher in all the three subscales: EE (median [interquartile interval]: 14.5 [16.3] vs. 17.0 [22.0], respectively, *P*-value not significant), DP (3.0 [5.8] vs. 6.0 [6.8], *P* <0.05), and PA (40.0 [8.0] vs. 42.5 [8.0] *P* <0.05). Increasing working hours per day also led to higher PA scores (*P* <0.05). The prevalence of burnout ranged between 2.0% and 27.7%, depending on the definition used.

1  
2  
3 **Conclusion:** High burnout is relatively common among Portuguese family doctors, yet  
4  
5 lower than reported for other European countries. Burnout relief measures should be  
6  
7 developed in order to prevent a further increase of BS among Portuguese FDs.  
8  
9

10 **Key Words:** Burnout, Portugal, family doctors, MBI-HSS.  
11

12  
13 **Article Focus:** In the last three decades, BS increased to worrisome levels in doctors,  
14  
15 including FDs, and there is scarce data concerning this condition in Portuguese FDs.  
16  
17

18  
19 **Key Messages:** The prevalence of burnout ranged between 2.0% and 27.7%,  
20  
21 depending on the definition used; but still, Portuguese FDs feel rewarded by their job.  
22  
23

24 **Strengths and Limitations:** This is, as far as we know, the first study ever on BS in  
25  
26 Portuguese FDs. The questionnaire MBI-HSS hadn't been validated in Portugal at the  
27  
28 time of the study; still, Cronbach's  $\alpha$  values ranged between 0.64 (for DP) and 0.90 (for  
29  
30 EE), also in agreement with literature.  
31  
32  
33  
34  
35  
36  
37  
38  
39  
40  
41  
42  
43  
44  
45  
46  
47  
48  
49  
50  
51  
52  
53  
54  
55  
56  
57  
58  
59  
60

## Introduction

In the last three decades, burnout syndrome increased to worrisome levels in doctors [1, 2], including family doctors (FD)[3]. Despite the presence of burnout most family doctors usually do not seek help[4], which might lead to a decrease in their performance and even compromise adequate treatment of patients.

Burnout is consequent to job-related chronic stress[5] and is characterized by a symptomatic triad of emotional exhaustion (EE) (feelings of tiredness and emptiness), depersonalization (DP) (empathy disappearance, cynicism and automatism) and a lack of personal accomplishment (PA) (lack of self-esteem and frustration)[5].

In 2008, a European study on burnout among European family doctors (the EGPRN study[3]) showed that 43% of respondents scored high for EE burnout, 35% for DP and 32% for PA, with 12% scoring high burnout in all three dimensions. Unfortunately, the EGPRN study did not include Portugal, so we conducted a study to assess the prevalence of burnout among Portuguese FDs, using the same methodology as the EGPRN.

## Method

This study was conducted between November 2010 and November 2011. A stratified and randomized sampling was conducted selecting 2 primary health care centers (HCC) from each of the 18 Portuguese continental districts and 2 archipelagos (Madeira and Azores) of Portugal as described in the site "Portal da Saúde" from the Portuguese Ministry of Health[6]. Questionnaires were sent with pre-paid return envelopes to previously contacted HCC employees, who distributed the questionnaires

1  
2  
3 with informed consent to every FD employed. 17 questionnaires were sent and  
4  
5 received via e-mail.  
6  
7

8  
9 FDs in HCCs work in either Family Health-Care Units (FHCU) or Personalized  
10  
11 Health-Care Units (PHCU). The first provides health-care to families, while the second  
12  
13 provides health-care to individuals in general. Burnout was assessed using the  
14  
15 Portuguese translation of the Maslach Burnout Inventory – Human Services Survey  
16  
17 (MBI-HSS)[4]. Answers to the MBI-HSS were used to classify the participants as having  
18  
19 high, average or low levels in EE, DP and PA dimensions of burnout. The following cut-  
20  
21 offs were used to define low, average or high levels of each dimension of the MBI-HSS:  
22  
23 EE: low,  $\leq 16$ ; average, 17-26; high,  $\geq 27$ ; DP: low,  $\leq 6$ ; average, 7-12; high,  $\geq 13$ ; PA: low,  
24  
25  $\geq 39$ ; average, 32-38; high,  $\leq 31$  [7]. As the definition of burnout is a controversial  
26  
27 subject, we applied different definitions as described in the literature: 1) high levels of  
28  
29 EE and DP, combined with low PA [8, 9]; 2) high EE and/or high DP[10, 11] and 3) high  
30  
31 negative score on EE in combination with high DP or low PA [12]. The study was  
32  
33 approved by the Ethics Commissions of North, Algarve, and Madeira, and also by all  
34  
35 Portuguese Regional Administrations.  
36  
37  
38  
39  
40  
41

42  
43 Statistical analysis was performed using SPSS v. 17.0 (IBM SPSS statistics,  
44  
45 Armonk, NY, USA). Results were expressed as median [interquartile interval], mean  $\pm$   
46  
47 standard deviation, or number of subjects (percentage). Comparisons were performed  
48  
49 using Mann-Whitney or Kruskal-Wallis nonparametric tests for quantitative data and  
50  
51 by chi-square for qualitative data. Multivariate analysis was conducted using logistic  
52  
53 regression. Results were considered significant if  $P < 0.05$ . As to missing data, for each  
54  
55 skipped MBI-HSS item, it was attributed the mean score calculated for that question's  
56  
57  
58  
59  
60

1  
2  
3 dimension. Two skipped questions were coded as missing value for the whole  
4  
5 dimension. Two answers for the same item were coded as one skipped question and  
6  
7 replaced by the average of that dimension.  
8  
9

## 10 11 12 13 **Results**

14  
15  
16 Overall, **371** questionnaires were sent, of which 153 (response rate 41%) were  
17  
18 retrieved. From these, only 150 were considered valid for the analysis. The main  
19  
20 results are summarized in **table 1**. Men were older and had more years of professional  
21  
22 activity than women. Overall, 25.3% of participants scored high for EE, 10.1% for DP  
23  
24 and 12.0% for PA; 2.0% scored high for all three dimensions. Men scored higher DP  
25  
26 and PA than women, while no differences were found for EE (**table 1**). No significant  
27  
28 bivariate association was found between burnout scores and age, years of practice,  
29  
30 hours spent at the primary care center per week, practice unit, and if working in more  
31  
32 than one institution (not shown – supplementary table 1 for reviewing purposes only).  
33  
34 In contrast, having children was related to increasing DP scores ( $P < 0.05$ ), and being  
35  
36 married or in civil union with increasing EE scores ( $P < 0.05$ ).  
37  
38  
39  
40  
41  
42

43 Finally, multivariate logistic regression including gender, age, marital status, if  
44  
45 having any children or not, years of professional activity, number of hours of work per  
46  
47 week, number of hours in contact with patients per day, practice unit, and if working in  
48  
49 any other institution, was performed according to the different definitions of burnout.  
50  
51 Increased risk for burnout was obtained for people working in Personalized (odds of  
52  
53 3.62,  $P < 0.05$ ) relative to Family Health Care Units and also for increasing years of  
54  
55  
56  
57  
58  
59  
60



1  
2  
3 professional activity (odds of 1.69,  $P < 0.05$ ), when considering burnout as, respectively,  
4  
5 high EE and/or high DP or high score on EE in combination with high DP or low PA.  
6  
7

8  
9 In **table 3** it is evident that Portugal FDs are comparatively in a more favorable  
10  
11 situation. Participants scoring at least high and at least average in one dimension were  
12  
13 33.0% and 53.5%, respectively; and 31.1% scored exclusively low in each dimension  
14  
15 (see **table 2**).  
16

## 17 18 19 Discussion

20  
21 To our knowledge, this is the first study ever to assess rates of burnout among  
22  
23 FDs in Portugal. Our study also complements the previous findings of the EGPRN  
24  
25 study[3], which assessed burnout among FDs from 12 European countries. The main  
26  
27 finding is that in Portugal, in overall, FDs have low levels of burnout for the three  
28  
29 subscales EE, DP and PA. In relation to each gender, men have higher symptoms of  
30  
31 burnout, but since they are significantly older and have more years of professional  
32  
33 activity than women, this might be an explanation for the different results.  
34  
35  
36  
37

38  
39 The prevalence of burnout ranged from 2.0% to 27.7%, depending on the  
40  
41 definition used. This wide range is due to the different combinations of EE, DP and PA  
42  
43 subscales, as indicated in **figure 1** [8-12]. Hence, it would be of interest that studies on  
44  
45 burnout report their results using one or several definitions, or as suggested in figure  
46  
47 1, in order to facilitate comparisons with the literature. Finally, if burnout is considered  
48  
49 as a continuous process, the majority of FDs is at risk, although with different grades of  
50  
51 risk (between 41.2% - 66.9%, considering the previous definitions of burnout and  
52  
53 excluding those who have low burnout symptoms in the three subscales), as shown in  
54  
55  
56  
57  
58  
59  
60

1  
2  
3 **table 2.** The Portuguese FDs had lower burnout scores than FDs from other European  
4 countries (see **table 3**). A possible explanation might be related to a slightly lower  
5 workload among Portuguese FDs compared to their colleagues from other countries.  
6  
7 For instance, Portugal has 198.3 FDs per 100,000 inhabitants, a much higher number in  
8 comparison with the United Kingdom, which has only 78.3 FDs per 100,000[13].  
9  
10 Further, a Portuguese FD has on average 1500[14] patients, again a value lower than in  
11 the UK (1800)[15]. Another possible explanation is that Portuguese FDs consider their  
12 job as very demanding, but very rewarding at the same time, as reflected by a lower  
13 prevalence of bad PA among men who have higher levels of EE and DP, in comparison  
14 to women, and also, by increasing significant ( $P < 0.05$ ) PA scores with increasing  
15 working hours per day (not shown – supplementary table 1 for reviewing purposes  
16 only). Still, further studies are advisable to better understand the low burnout  
17 prevalence and scores among Portuguese doctors relative to their European  
18 counterparts.  
19  
20  
21  
22  
23  
24  
25  
26  
27  
28  
29  
30  
31  
32  
33  
34  
35  
36

37 This study has some limitations worth noting. First the response rate (41%) was  
38 rather low, but identical to the one reported by the EGPRN study[3]. The questionnaire  
39 MBI hadn't been validated in Portugal at the time of the study; still, Cronbach's  $\alpha$   
40 values ranged between 0.64 (for DP) and 0.90 (for EE), also in agreement with those  
41 reported in the EGPRN study[3]. Finally, only FDs present at the HCCs answered, thus  
42 excluding those on sick leave; hence, it is possible that the burnout rates reported are  
43 underestimated. Still, in the absence of other studies available, our results provide the  
44 first estimation of the burnout rates among FDs in Portugal. The results of our study  
45 have important implications. In Portugal, there is currently no aid for dealing with  
46  
47  
48  
49  
50  
51  
52  
53  
54  
55  
56  
57  
58  
59  
60

1  
2  
3 burnout among health professionals. Hence, it would be of uttermost importance that  
4  
5 the Portuguese Ministry of Health, the Portuguese College of Physicians or the  
6  
7 Regional Health Administrations provide some support at institutional and individual  
8  
9 levels. Finally, another study would be desirable to assess the progression of burnout  
10  
11 among Portuguese FDs.  
12  
13

14  
15 In summary, our results suggest that a significant percentage of Portuguese FD  
16  
17 present with burnout. These values are nevertheless lower than reported in other  
18  
19 European countries.  
20  
21

## 22 23 24 25 26 **Acknowledgements** 27

28  
29 We would like to deeply thank the doctors, nurses and secretaries employed in  
30  
31 the following HCs: Aljezur, Alvalade, Barcelos, Benfica, Borba, Castro Daire, Celorico de  
32  
33 Bastos, Coruche, Crato, Elvas, Foz do Douro, Francisco Jardim, Gouveia, Grândola,  
34  
35 Guarda, Ílhavo, Jardim do Mar, Lousã, Mangualde, Marco Canaveses, Marinha grande,  
36  
37 Mação, Miranda do Douro, Moita, Odemira, Paredes de Coura, Penamacor, Peso da  
38  
39 Régua, Pombal, Ponte da Barca, Proença-a-Nova, Ribeira Grande, Santa Cruz da  
40  
41 Graciosa, Tavira, Vagos, Viana do Alentejo, Vidigueira, Vila Nova Poiares, Vila Pouca de  
42  
43 Aguiar and Vimioso.  
44  
45  
46  
47  
48  
49  
50  
51  
52  
53  
54  
55  
56  
57  
58  
59  
60

**Table 1** – Main characteristics of the participants.

| Variables                              | All                      | Male                   | Female                  | Test                 |
|----------------------------------------|--------------------------|------------------------|-------------------------|----------------------|
| Age                                    | 54.5 [9.0]<br>(n = 148)  | 55.0 [5.0]<br>(n = 67) | 53.0 [13.0]<br>(n = 81) | 1813.0***            |
| Years of professional activity         | 29.0 [10.3]<br>(n = 150) | 30.0 [4.0]<br>(n = 67) | 28.0 [5.0]<br>(n = 83)  | 2103.0*              |
| Hours of work per week                 | 42.0 [3.0]<br>(n = 150)  | 42.0 [3.4]<br>(n = 68) | 42.0 [2.0]<br>(n = 82)  | 2744.0 <sup>ns</sup> |
| Hours of contact with patients per day | 7.0 [1.5]<br>(n = 138)   | 7.0 [1.6]<br>(n = 61)  | 7.0 [1.6]<br>(n = 77)   | 2201.0 <sup>ns</sup> |
| Emotional exhaustion score             | 16.0 [19.0]              | 17.0 [22.0]            | 14.5 [16.3]             | 2584.5 <sup>ns</sup> |
| High emotional exhaustion score        | 38 (25.3)<br>(n = 150)   | 21 (30.9)<br>(n = 68)  | 17 (20.7)<br>(n = 82)   | 2.08 <sup>ns</sup>   |
| Depersonalization score                | 4.0 [5.0]                | 6.0 [6.8]              | 3.0 [5.8]               | 2078.0*              |
| High depersonalization score           | 15 (10.1)<br>(n = 148)   | 10 (14.7)<br>(n = 68)  | 5 (6.3)<br>(n = 80)     | 3.52 <sup>ns</sup>   |
| Personal Accomplishment score          | 41.0 [8.0]               | 42.5 [8.0]             | 40.0 [8.0]              | 2206.0*              |
| Low personal accomplishment score      | 18 (12.0)<br>(n = 150)   | 6 (8.8)<br>(n = 68)    | 12 (14.6)<br>(n = 82)   | 4.28 <sup>ns</sup>   |
| Burnout <sup>§</sup>                   | 3 (2.0)<br>(n = 148)     | 2 (2.9)<br>(n = 68)    | 1 (1.3)<br>(n = 80)     | NA                   |
| Burnout <sup>§§</sup>                  | 41 (27.7)<br>(n = 148)   | 22 (32.4)<br>(n = 68)  | 19 (23.8)<br>(n = 80)   | 1.36 <sup>ns</sup>   |
| Burnout <sup>§§§</sup>                 | 18 (12.2)<br>(n = 148)   | 9 (13.2)<br>(n = 68)   | 9 (11.3)<br>(n = 80)    | 0.14 <sup>ns</sup>   |

1  
2  
3 Results are expressed as median [interquartile interval] or number (percentage) of the  
4  
5 total subjects. Comparisons performed with Mann-Whitney nonparametric test for  
6  
7 quantitative data and by chi-square for qualitative data: NA, not accessible for  
8  
9 statistical analysis. NS, not significant. \*,  $p < 0.05$ . \*\*,  $p < 0.01$ , \*\*\*,  $p < 0.001$ . Burnout  
10  
11 defined as § high levels of EE and DP, combined with low PA; §§ high EE and/or high DP  
12  
13 and §§§ high score on EE in combination with high DP or low PA.  
14  
15  
16  
17  
18  
19  
20  
21  
22  
23  
24  
25  
26  
27  
28  
29  
30  
31  
32  
33  
34  
35  
36  
37  
38  
39  
40  
41  
42  
43  
44  
45  
46  
47  
48  
49  
50  
51  
52  
53  
54  
55  
56  
57  
58  
59  
60

**Table 2** – Number of participants with low, average and high burnout scores in none, one, two or three subscales.

|         |  | High Burnout |           |           |         |           |
|---------|--|--------------|-----------|-----------|---------|-----------|
|         |  | 0            | 1         | 2         | 3       | Total     |
| Average |  |              |           |           |         |           |
| burnout |  |              |           |           |         |           |
| 0       |  | 46 (31.1)    | 15 (10.1) | 5 (3.4)   | 3 (2.0) | 69 (46.6) |
| 1       |  | 39 (26.4)    | 14 (9.5)  | 10 (6.8)  | -       | 63 (42.6) |
| 2       |  | 12 (8.1)     | 2 (1.4)   | -         | -       | 14 (9.5)  |
| 3       |  | 2 (1.4)      | -         | -         | -       | 2 (1.4)   |
| Total   |  | 99 (66.9)    | 31 (20.9) | 15 (10.1) | 3 (2.0) | 148 (100) |

The possible combinations for the different subscales describing increasing burnout are shown in the table. Participants with low burnout scores in one dimension are represented by excluding average or high burnout. Results are expressed as number (percentage) of the total subjects.

**Table 3** – Results for each burnout subscale in previous and recent European studies.

| European Studies                                      | EE          | DP          | PA           |
|-------------------------------------------------------|-------------|-------------|--------------|
| EGPRN study, Overall<br>(2008, <i>n</i> = 1393)[3]    | 24.0 ± 16.0 | 7.0 ± 7.0   | 37 ± 11.0    |
| Spanish FDs <sup>1</sup><br>(2005, <i>n</i> = 86)[16] | 27.4 ± 11.8 | 10.07 ± 6.4 | 35.9 ± 10.07 |
| Swiss FDs<br>(2002, <i>n</i> = 1755)[17]              | 17.9 ± 9.8  | 6.5 ± 4.7   | 39.6 ± 6.5   |
| EGPRN study<br>(2008)[3]                              | High EE (%) | High DP (%) | Low PA (%)   |
| Overall<br>( <i>n</i> = 1393)                         | 43.0        | 35.3        | 32.0         |
| Bulgaria<br>( <i>n</i> = 69)                          | 62.3        | 30.4        | 18.8         |
| Croatia<br>( <i>n</i> = 117)                          | 41.9        | 12.0        | 13.7         |
| France<br>( <i>n</i> = 178)                           | 33.7        | 35.4        | 27.5         |
| Greece<br>( <i>n</i> = 45)                            | 31.8        | 73.3        | 93.2         |
| Hungary<br>( <i>n</i> = 87)                           | 36.8        | 35.6        | 26.4         |
| Italy<br>( <i>n</i> = 147)                            | 68.0        | 55.1        | 40.8         |
| Malta<br>( <i>n</i> = 129)                            | 36.4        | 31.0        | 24.8         |
| Poland<br>( <i>n</i> = 150)                           | 48.0        | 34.0        | 30.0         |
| Spain<br>( <i>n</i> = 86)                             | 30.2        | 34.9        | 25.6         |
| Sweden<br>( <i>n</i> = 109)                           | 45.9        | 34.9        | 11.9         |
| Turkey<br>( <i>n</i> = 112)                           | 15.2        | 15.2        | 69.4         |
| England (UK)<br>( <i>n</i> = 164)                     | 54.3        | 44.5        | 32.9         |
| <b>Portugal (this study)<br/>(<i>n</i> = 150)</b>     | 25.3        | 10.0        | 12.0         |

Results are expressed as mean ± standard deviation or percentage. FD, family doctor. EE,

Emotional Exhaustion; DP, Depersonalization; PA, Personal Accomplishment. 1. Corresponds to

the year of publication, not to the time of survey.

1  
2  
3  
4  
5  
6  
7  
8  
9  
10  
11  
12  
13  
14  
15  
16  
17  
18  
19  
20  
21  
22  
23  
24  
25  
26  
27  
28  
29  
30  
31  
32  
33  
34  
35  
36  
37  
38  
39  
40  
41  
42  
43  
44  
45  
46  
47  
48  
49  
50  
51  
52  
53  
54  
55  
56  
57  
58  
59  
60

**Figure 1** - Venn's diagram with the number of participants with high burnout scores in one, two or three subscales, N = 150.

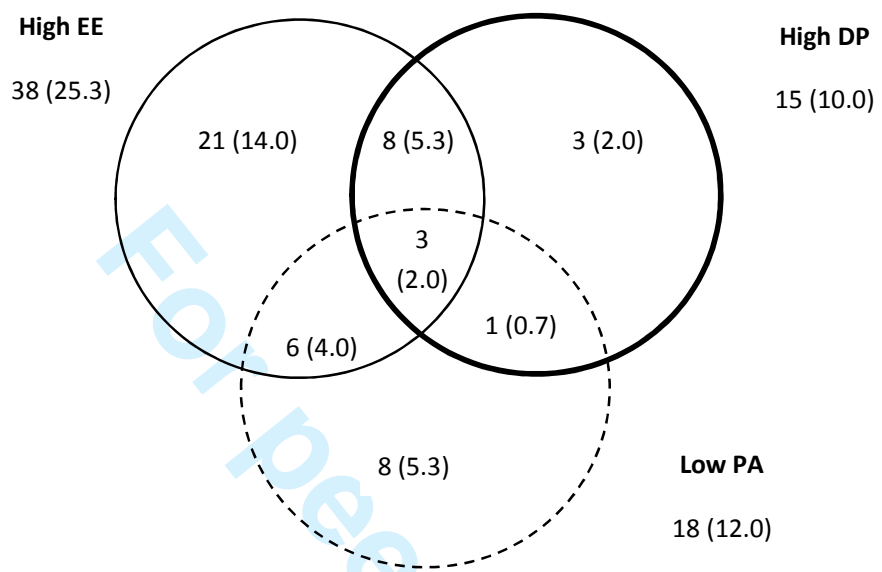

Results are expressed as number (percentage) of subjects.



**Supplementary table 1** - Burnout mean scores according to selected participants' characteristics.

|                          | Emotional Exhaustion | <i>Test</i>          | Depersonalization | <i>Test</i>          | Personal Accomplishment | <i>Test</i>          |
|--------------------------|----------------------|----------------------|-------------------|----------------------|-------------------------|----------------------|
| <b>Gender</b>            |                      |                      |                   |                      |                         |                      |
| Male                     | 19.7 ± 13.1          | 2584.5 <sup>ns</sup> | 6.6 ± 4.7         | <b>2078.0*</b>       | 40.5 ± 7.1              | <b>2206.0*</b>       |
| Female                   | 17.7 ± 12.1          |                      | 4.7 ± 4.8         |                      | 38.5 ± 7.4              |                      |
| <b>Age</b>               |                      |                      |                   |                      |                         |                      |
| ≤45                      | 16.5 ± 11.6          | 1596.0 <sup>ns</sup> | 4.8 ± 3.6         | 1713.5 <sup>ns</sup> | 40.1 ± 4.4              | 1704.0 <sup>ns</sup> |
| >45                      | 19.1 ± 12.8          |                      | 5.8 ± 5.7         |                      | 39.4 ± 7.9              |                      |
| <b>Children</b>          |                      |                      |                   |                      |                         |                      |
| Yes                      | 19.0 ± 12.5          | 801.0 <sup>ns</sup>  | 5.8 ± 5.2         | <b>678.0*</b>        | 39.7 ± 7.0              | 794.5 <sup>ns</sup>  |
| No                       | 15.2 ± 12.9          |                      | 3.9 ± 5.9         |                      | 36.6 ± 9.8              |                      |
| <b>Marital status</b>    |                      |                      |                   |                      |                         |                      |
| Single/Divorced          | 14.9 ± 12.6          | <b>1452.0*</b>       | 4.6 ± 5.8         | 1479.0 <sup>ns</sup> | 39.6 ± 8.5              | 1786.5 <sup>ns</sup> |
| Married/Union            | 19.6 ± 12.4          |                      | 5.8 ± 5.0         |                      | 39.4 ± 7.1              |                      |
| <b>Practice years</b>    |                      |                      |                   |                      |                         |                      |
| ≤20                      | 15.9 ± 11.1          | 1688.5 <sup>ns</sup> | 4.6 ± 3.5         | 1879.5 <sup>ns</sup> | 39.9 ± 4.6              | 1912.5 <sup>ns</sup> |
| >20                      | 19.6 ± 12.9          |                      | 5.9 ± 5.7         |                      | 39.2 ± 8.0              |                      |
| <b>Hours/day patien.</b> |                      |                      |                   |                      |                         |                      |
| ≤5                       | 17.4 ± 7.8           |                      | 5.1 ± 4.1         |                      | 30.8 ± 11.5             |                      |
| 6-8                      | 19.2 ± 13.2          | 0.7 <sup>ns</sup>    | 5.8 ± 5.5         | 3.3 <sup>ns</sup>    | 39.6 ± 6.9              | <b>6.1 *</b>         |
| ≥9                       | 23.1 ± 13.4          |                      | 9.1 ± 5.9         |                      | 36.6 ± 8.6              |                      |
| <b>Hours/week inst.</b>  |                      |                      |                   |                      |                         |                      |
| ≤40                      | 17.9 ± 13.7          | 2368.5 <sup>ns</sup> | 5.4 ± 5.8         | 2234.5 <sup>ns</sup> | 39.5 ± 8.8              | 2356.5 <sup>ns</sup> |
| >40                      | 19.3 ± 11.7          |                      | 5.8 ± 4.9         |                      | 39.3 ± 6.2              |                      |
| <b>Practice unit</b>     |                      |                      |                   |                      |                         |                      |
| FHCU                     | 16.1 ± 10.8          | 1701.0 <sup>ns</sup> | 5.3 ± 4.6         | 1915.5 <sup>ns</sup> | 41.0 ± 5.7              | 1663.5 <sup>ns</sup> |
| PHCU                     | 19.4 ± 12.9          |                      | 5.6 ± 5.1         |                      | 38.8 ± 7.8              |                      |
| <b>Other inst.</b>       |                      |                      |                   |                      |                         |                      |
| Yes                      | 16.8 ± 12.0          | 2174.0 <sup>ns</sup> | 5.5 ± 5.3         | 2211.5 <sup>ns</sup> | 40.2 ± 7.1              | 2237.5 <sup>ns</sup> |
| No                       | 19.3 ± 12.9          |                      | 5.6 ± 5.3         |                      | 39.0 ± 7.6              |                      |

Results are expressed as mean ± standard deviation. Comparisons were performed with Mann-

Whitney or Kruskal-Wallis: NS, not significant. \*, p <0.05. FHCU, Family Health Care Unit.

PHCU, Personalized Health Care Unit.

## Bibliography

1. Devi S. Doctors in distress. *Lancet*, 2011;377:454-5
2. Web page: Monn MA. Mindfulness Program Staves Off Primary Care Burnout, in *Family Practice News*, 2009
3. Soler JK, Yaman H, Esteva M, et al. Burnout in European Family Doctors: the EGPRN study. *Fam Pract* 2008;25:245-65
4. Delbrouck M. Síndrome de Exaustão (Burnout). 2006, Climepsi ed.
5. de Valk M, Oostrom C. Burnout in the medical profession - causes, consequences and solutions. *Occupational Health at Work* 2007;3
6. Portuguese Ministry of Health. Portal da Saúde. 2010; Available from: <http://www.portaldasaude.pt/portal>
7. Maslach C, Jackson S. MBI-Human Services Survey. Available from: <http://www.mindgarden.com/products/mbi.htm>
8. Maslach C. Personal communication. September 24, 2008
9. Legassie J, Zibrowski EM, Goldszmidt MA. Measuring resident well-being: impostorism and burnout syndrome in residency. *J Gen Intern Med* 2008; 23:1090-4
10. Schaufeli W, Bakker A, Hoogduin K, et al. On the clinical validity of the Maslach burnout inventory and the burnout measure. *Psychol Health* 2001;16:565-82
11. Thomas NK. Resident Burnout. *JAMA* 2004;292:2880-2889
12. Brenninkmeijer V, VanYperen N. How to conduct research on burnout: advantages and disadvantages of a unidimensional approach in burnout research. *Occup Environ Med*, 2003;60:i16-i20
13. World Health Organisation. European health for all database. 2010; Available from: <http://data.euro.who.int/hfad/>
14. Web page: Portugal: The healthcare system. Available from: <http://www.uemo.eu/gp-in-europe/86-portugal.html>
15. Web page: General Practitioners in the UK. Available from: <http://www.rxpgonline.com/article1292.html>
16. Esteva M, Larraz C, Soler J, et al. Burn-out in Spanish general practitioners *Aten Primaria* 2005;35:108-9
17. Goehring C, Bouvier Gallacchi M, Künzi B, et al. Psychosocial and professional characteristics of burnout in Swiss primary care practitioners: a cross-sectional survey. *Swiss Med Wkly* 2005;135:101-108

STROBE 2007 (v4) Statement—Checklist of items that should be included in reports of *cross-sectional studies*

| Section/Topic                | Item # | Recommendation                                                                                                                                                                       | Reported on page # |
|------------------------------|--------|--------------------------------------------------------------------------------------------------------------------------------------------------------------------------------------|--------------------|
| Title and abstract           | 1      | (a) Indicate the study's design with a commonly used term in the title or the abstract                                                                                               | Page 1             |
|                              |        | (b) Provide in the abstract an informative and balanced summary of what was done and what was found                                                                                  | Pages 3-4          |
| <b>Introduction</b>          |        |                                                                                                                                                                                      |                    |
| Background/rationale         | 2      | Explain the scientific background and rationale for the investigation being reported                                                                                                 | Page 5             |
| Objectives                   | 3      | State specific objectives, including any prespecified hypotheses                                                                                                                     | Page 5             |
| <b>Methods</b>               |        |                                                                                                                                                                                      |                    |
| Study design                 | 4      | Present key elements of study design early in the paper                                                                                                                              | Page 5             |
| Setting                      | 5      | Describe the setting, locations, and relevant dates, including periods of recruitment, exposure, follow-up, and data collection                                                      | Page 5             |
| Participants                 | 6      | (a) Give the eligibility criteria, and the sources and methods of selection of participants                                                                                          | Pages 5-6          |
| Variables                    | 7      | Clearly define all outcomes, exposures, predictors, potential confounders, and effect modifiers. Give diagnostic criteria, if applicable                                             | Page 6             |
| Data sources/<br>measurement | 8*     | For each variable of interest, give sources of data and details of methods of assessment (measurement). Describe comparability of assessment methods if there is more than one group | Page 6             |
| Bias                         | 9      | Describe any efforts to address potential sources of bias                                                                                                                            | Page 6             |

|                        |     |                                                                                                                                                                                                              |           |
|------------------------|-----|--------------------------------------------------------------------------------------------------------------------------------------------------------------------------------------------------------------|-----------|
| Study size             | 10  | Explain how the study size was arrived at                                                                                                                                                                    | Page 5-6  |
| Quantitative variables | 11  | Explain how quantitative variables were handled in the analyses. If applicable, describe which groupings were chosen and why                                                                                 | Page 6    |
| Statistical methods    | 12  | (a) Describe all statistical methods, including those used to control for confounding                                                                                                                        | Page 6    |
|                        |     | (b) Describe any methods used to examine subgroups and interactions                                                                                                                                          | Page 6    |
|                        |     | (c) Explain how missing data were addressed                                                                                                                                                                  | Pages 6-7 |
|                        |     | (d) If applicable, describe analytical methods taking account of sampling strategy                                                                                                                           |           |
|                        |     | (e) Describe any sensitivity analyses                                                                                                                                                                        |           |
| <b>Results</b>         |     |                                                                                                                                                                                                              |           |
| Participants           | 13* | (a) Report numbers of individuals at each stage of study—eg numbers potentially eligible, examined for eligibility, confirmed eligible, included in the study, completing follow-up, and analysed            |           |
|                        |     | (b) Give reasons for non-participation at each stage                                                                                                                                                         |           |
|                        |     | (c) Consider use of a flow diagram                                                                                                                                                                           |           |
| Descriptive data       | 14* | (a) Give characteristics of study participants (eg demographic, clinical, social) and information on exposures and potential confounders                                                                     |           |
|                        |     | (b) Indicate number of participants with missing data for each variable of interest                                                                                                                          |           |
| Outcome data           | 15* | Report numbers of outcome events or summary measures                                                                                                                                                         |           |
| Main results           | 16  | (a) Give unadjusted estimates and, if applicable, confounder-adjusted estimates and their precision (eg, 95% confidence interval). Make clear which confounders were adjusted for and why they were included | Pages 8-9 |
|                        |     | (b) Report category boundaries when continuous variables were categorized                                                                                                                                    |           |
|                        |     | (c) If relevant, consider translating estimates of relative risk into absolute risk for a meaningful time period                                                                                             |           |

|                          |    |                                                                                                                                                                            |            |
|--------------------------|----|----------------------------------------------------------------------------------------------------------------------------------------------------------------------------|------------|
| Other analyses           | 17 | Report other analyses done—eg analyses of subgroups and interactions, and sensitivity analyses                                                                             | Page 9     |
| <b>Discussion</b>        |    |                                                                                                                                                                            |            |
| Key results              | 18 | Summarise key results with reference to study objectives                                                                                                                   | Page 10    |
| Limitations              | 19 | Discuss limitations of the study, taking into account sources of potential bias or imprecision. Discuss both direction and magnitude of any potential bias                 | Page 9     |
| Interpretation           | 20 | Give a cautious overall interpretation of results considering objectives, limitations, multiplicity of analyses, results from similar studies, and other relevant evidence | Pages 8-9  |
| Generalisability         | 21 | Discuss the generalisability (external validity) of the study results                                                                                                      | Pages 9-10 |
| <b>Other information</b> |    |                                                                                                                                                                            |            |
| Funding                  | 22 | Give the source of funding and the role of the funders for the present study and, if applicable, for the original study on which the present article is based              |            |

\*Give information separately for cases and controls in case-control studies and, if applicable, for exposed and unexposed groups in cohort and cross-sectional studies.

**Note:** An Explanation and Elaboration article discusses each checklist item and gives methodological background and published examples of transparent reporting. The STROBE checklist is best used in conjunction with this article (freely available on the Web sites of PLoS Medicine at <http://www.plosmedicine.org/>, Annals of Internal Medicine at <http://www.annals.org/>, and Epidemiology at <http://www.epidem.com/>). Information on the STROBE Initiative is available at [www.strobe-statement.org](http://www.strobe-statement.org).



**BURNOUT LEVELS AMONG PORTUGUESE FAMILY DOCTORS:  
A NATIONWIDE SURVEY**

|                                 |                                                                                                                                                                                                                                                                                                                                                                                                                                                                                                                                                          |
|---------------------------------|----------------------------------------------------------------------------------------------------------------------------------------------------------------------------------------------------------------------------------------------------------------------------------------------------------------------------------------------------------------------------------------------------------------------------------------------------------------------------------------------------------------------------------------------------------|
| Journal:                        | <i>BMJ Open</i>                                                                                                                                                                                                                                                                                                                                                                                                                                                                                                                                          |
| Manuscript ID:                  | bmjopen-2012-001050.R1                                                                                                                                                                                                                                                                                                                                                                                                                                                                                                                                   |
| Article Type:                   | Research                                                                                                                                                                                                                                                                                                                                                                                                                                                                                                                                                 |
| Date Submitted by the Author:   | 20-Apr-2012                                                                                                                                                                                                                                                                                                                                                                                                                                                                                                                                              |
| Complete List of Authors:       | Marcelino, Gisela; Medical Faculty of Lisbon, University of Lisbon, Cerveira, João Miguel; Medical Faculty of Lisbon, University of Lisbon, Carvalho, Inês; Medical Faculty of Lisbon, University of Lisbon, Costa, João; Medical Faculty of Lisbon, University of Lisbon, Lopes, Marta; Medical Faculty of Lisbon, University of Lisbon, Calado, Nelson; Alvalade Health Center, Av. do Brasil, 53, Pavilhão 33, Parque de Saúde de Lisboa, Marques-Vidal, Pedro; Institute of Social and Preventive Medicine (IUMSP), University Hospital of Lausanne, |
| <b>Primary Subject Heading</b>: | General practice / Family practice                                                                                                                                                                                                                                                                                                                                                                                                                                                                                                                       |
| Secondary Subject Heading:      | Occupational and environmental medicine, Public health, Mental health                                                                                                                                                                                                                                                                                                                                                                                                                                                                                    |
| Keywords:                       | Quality in health care < HEALTH SERVICES ADMINISTRATION & MANAGEMENT, PREVENTIVE MEDICINE, PRIMARY CARE                                                                                                                                                                                                                                                                                                                                                                                                                                                  |
|                                 |                                                                                                                                                                                                                                                                                                                                                                                                                                                                                                                                                          |

SCHOLARONE™  
Manuscripts

Only

# BURNED-OUT BUT PROUD PORTUGUESE FAMILY DOCTORS

## A CROSS-SECTIONAL SURVEY

**Short title:** Burnout in Portuguese Family Doctors

Gisela Marcelino\* <sup>1</sup>; João Melich-Cerveira\* <sup>1</sup>; Inês Carvalho<sup>1</sup>; João Azeredo Costa<sup>1</sup>;  
Marta Lopes<sup>1</sup>; Nelson Calado<sup>2</sup> and Pedro Marques-Vidal <sup>3,4</sup>

<sup>1</sup> Medical Faculty of Lisbon, University of Lisbon, Avenida Professor Egas Moniz, 1649-028 Lisbon, Portugal; <sup>2</sup> Alvalade Health Center, Av. do Brasil, 53, Pavilhão 33, Parque de Saúde de Lisboa, Lisbon, Portugal; <sup>3</sup> Institute of Social and Preventive Medicine (IUMSP), University Hospital of Lausanne, Route de la Corniche 2, 1066 Epalinges, Switzerland;

\* Both authors contributed equally

### Emails of authors:

Gisela Marcelino (GM): giselamarcelino@sapo.pt

João Melich-Cerveira (JMC): joao\_cerveira86@hotmail.com

Inês Carvalho (IC): inesdcarvalho@gmail.com

João Azeredo Costa (JAC): j.azeredo.costa@gmail.com

Marta Lopes (ML): msclopes13@gmail.com

Nelson Calado (NC): caladonelson@yahoo.com.br

Pedro Marques-Vidal (PMV): pedro-manuel.marques-vidal@chuv.ch

### Address for reprints and correspondence

Gisela Marcelino

Praça Artur Portela

2, 1º esquerdo

1500-061, Lisboa

Tel: + 351969911416

E-mail: giselamarcelino@sapo.pt

We state that Gisela Marcelino and João Melich-Cerveira, having contributed equally, were responsible for the conception, design, and acquisition of data. They both

1  
2  
3 worked statistically the data, and wrote the article. We also state that Pedro Marques-  
4 Vidal was the tutor of this research study and wrote part of the article. Inês Carvalho,  
5 João Azeredo Costa and Marta Lopes helped with the acquisition of data and, along  
6 with Nelson Calado, scientifically reviewed the paper and made major modifications  
7 regarding intellectual content. All authors have given their final approval of the version  
8 to be submitted.  
9

10  
11  
12 We state that there is no conflict of interest for all authors.  
13

14  
15 We state that that the manuscript, including related data, figures and tables have not  
16 been previously published, that the manuscript is not under consideration elsewhere,  
17 and that there is no additional data available.  
18  
19

20  
21 We also state that this study did not receive any funding, and that it was approved by  
22 the Ethics Commissions of North, Algarve, and Madeira, and also by all Portuguese  
23 Regional Administrations.  
24  
25

26  
27 I, Gisela Marcelino, "the Corresponding Author has the right to grant on behalf of all  
28 authors and does grant on behalf of all authors, an exclusive licence (or non exclusive  
29 for government employees) on a worldwide basis to the BMJ Publishing Group Ltd and  
30 its Licensees to permit this article (if accepted) to be published in BMJ editions and any  
31 other BMJ PGL products and sublicences to exploit all subsidiary rights, as set out in the  
32 licence ([http://resources.bmj.com/bmj/authors/checklists-forms/licence-for-](http://resources.bmj.com/bmj/authors/checklists-forms/licence-for-publication)  
33 publication)."  
34  
35  
36  
37  
38  
39  
40  
41  
42

43 **Abstract + main text: 1881**

44  
45  
46 **Number of tables: 3**

**Number of figures: 1**

**Number of references: 17**



**Abstract**

**Aim:** To characterize the prevalence of burnout syndrome (BS) in a sample of FDs working in the Portuguese National Health System.

**Design:** Cross-sectional survey.

**Setting:** Primary Health Care Centers (HCC) from the 18 continental districts and 2 archipelagos of Portugal.

**Method:** The Portuguese version of the Maslach Burnout Inventory–Human Services Survey (MBI–HSS) was sent to 40 randomly selected health-care centers (HCC) and distributed to the FDs employed. Socio-demographic and work-related data was also collected. Participants were classified as having high, average or low levels of emotional exhaustion (EE), depersonalization (DP) and personal accomplishment (PA) dimensions of burnout.

**Results:** 371 questionnaires were sent, of which 153 (83 women, age range 29-64 years; response rate 41%) returned. One quarter (25.3%) of FDs scored high for emotional exhaustion (EE), 10.0% for depersonalization (DP) and 12.0% for lack of personal accomplishment (PA). In comparison with women, men scored higher in all the three subscales: EE (median [interquartile interval]: 14.5 [16.3] vs. 17.0 [22.0], respectively, *P*-value not significant), DP (3.0 [5.8] vs. 6.0 [6.8], *P* <0.05), and PA (40.0 [8.0] vs. 42.5 [8.0] *P* <0.05). Increasing working hours per day also led to higher PA scores (*P* <0.05). The prevalence of burnout ranged between 2.0% and 27.7%, depending on the definition used.

1  
2  
3 **Conclusion:** High burnout is relatively common among Portuguese family doctors, yet  
4  
5 lower than reported for other European countries. Burnout relief measures should be  
6  
7 developed in order to prevent a further increase of BS among Portuguese FDs.  
8  
9

10 **Key Words:** Burnout, Portugal, family doctors, MBI-HSS.  
11

12  
13 **Article Focus:** In the last three decades, BS increased to worrisome levels in doctors,  
14  
15 including FDs, and there is scarce data concerning this condition in Portuguese FDs.  
16  
17

18  
19 **Key Messages:** The prevalence of burnout ranged between 2.0% and 27.7%,  
20  
21 depending on the definition used; but still, Portuguese FDs feel rewarded by their job.  
22  
23

24 **Strengths and Limitations:** This is, as far as we know, the first study ever on BS in  
25  
26 Portuguese FDs. The questionnaire MBI-HSS hadn't been validated in Portugal at the  
27  
28 time of the study; still, Cronbach's  $\alpha$  values ranged between 0.64 (for DP) and 0.90 (for  
29  
30 EE), also in agreement with literature.  
31  
32  
33  
34  
35  
36  
37  
38  
39  
40  
41  
42  
43  
44  
45  
46  
47  
48  
49  
50  
51  
52  
53  
54  
55  
56  
57  
58  
59  
60

## Introduction

In the last three decades, burnout syndrome increased to worrisome levels in doctors [1, 2], including family doctors (FD)[3]. Despite the presence of burnout most family doctors usually do not seek help[4], which might lead to a decrease in their performance and even compromise adequate treatment of patients.

Burnout is consequent to job-related chronic stress[5] and is characterized by a symptomatic triad of emotional exhaustion (EE) (feelings of tiredness and emptiness), depersonalization (DP) (empathy disappearance, cynicism and automatism) and a lack of personal accomplishment (PA) (lack of self-esteem and frustration)[5].

In 2008, a European study on burnout among European family doctors (the EGPRN study[3]) showed that 43% of respondents scored high for EE burnout, 35% for DP and 32% for PA, with 12% scoring high burnout in all three dimensions. Unfortunately, the EGPRN study did not include Portugal, so we conducted a study to assess the prevalence of burnout among Portuguese FDs, using the same methodology as the EGPRN.

## Method

This study was conducted between November 2010 and November 2011. A stratified and randomized sampling was conducted selecting 2 primary health care centers (HCC) from each of the 18 Portuguese continental districts and 2 archipelagos (Madeira and Azores) of Portugal as described in the site "Portal da Saúde" from the Portuguese Ministry of Health[6]. Questionnaires were sent with pre-paid return envelopes to previously contacted HCC employees, who distributed the questionnaires

1  
2  
3 with informed consent to every FD employed. 17 questionnaires were sent and  
4  
5 received via e-mail.  
6  
7

8  
9 FDs in HCCs work in either Family Health-Care Units (FHCU) or Personalized  
10 Health-Care Units (PHCU). The first provides health-care to families, while the second  
11 provides health-care to individuals in general. Burnout was assessed using the  
12 Portuguese translation of the Maslach Burnout Inventory – Human Services Survey  
13 (MBI-HSS)[4]. Answers to the MBI-HSS were used to classify the participants as having  
14 high, average or low levels in EE, DP and PA dimensions of burnout. The following cut-  
15 offs were used to define low, average or high levels of each dimension of the MBI-HSS:  
16 EE: low,  $\leq 16$ ; average, 17-26; high;  $\geq 27$ ; DP: low,  $\leq 6$ ; average, 7-12; high,  $\geq 13$ ; PA: low,  
17  $\geq 39$ ; average, 32-38; high,  $\leq 31$  [7]. As the definition of burnout is a controversial  
18 subject, we applied different definitions as described in the literature: 1) high levels of  
19 EE and DP, combined with low PA [8, 9]; 2) high EE and/or high DP[10, 11] and 3) high  
20 negative score on EE in combination with high DP or low PA [12]. The study was  
21 approved by the Ethics Commissions of North, Algarve, and Madeira, and also by all  
22 Portuguese Regional Administrations.  
23  
24  
25  
26  
27  
28  
29  
30  
31  
32  
33  
34  
35  
36  
37  
38  
39  
40  
41

42  
43 Statistical analysis was performed using SPSS v. 17.0 (IBM SPSS statistics,  
44 Armonk, NY, USA). Results were expressed as median [interquartile interval], mean  $\pm$   
45 standard deviation, or number of subjects (percentage). Comparisons were performed  
46 using Mann-Whitney or Kruskal-Wallis nonparametric tests for quantitative data and  
47 by chi-square for qualitative data. Multivariate analysis was conducted using logistic  
48 regression. Results were considered significant if  $P < 0.05$ . As to missing data, for each  
49 skipped MBI-HSS item, it was attributed the mean score calculated for that question's  
50  
51  
52  
53  
54  
55  
56  
57  
58  
59  
60

1  
2  
3 dimension. Two skipped questions were coded as missing value for the whole  
4  
5 dimension. Two answers for the same item were coded as one skipped question and  
6  
7 replaced by the average of that dimension.  
8  
9

## 10 11 12 13 **Results**

14  
15  
16 Overall, **371** questionnaires were sent, of which 153 (response rate 41%) were  
17  
18 retrieved. From these, only 150 were considered valid for the analysis. The main  
19  
20 results are summarized in **table 1**. Men were older and had more years of professional  
21  
22 activity than women. Overall, 25.3% of participants scored high for EE, 10.1% for DP  
23  
24 and 12.0% for PA; 2.0% scored high for all three dimensions. Men scored higher DP  
25  
26 and PA than women, while no differences were found for EE (**table 1**). No significant  
27  
28 bivariate association was found between burnout scores and age, years of practice,  
29  
30 hours spent at the primary care center per week, practice unit, and if working in more  
31  
32 than one institution (not shown – supplementary table 1 for reviewing purposes only).  
33  
34 In contrast, having children was related to increasing DP scores ( $P < 0.05$ ), and being  
35  
36 married or in civil union with increasing EE scores ( $P < 0.05$ ).  
37  
38  
39  
40  
41  
42

43 Finally, multivariate logistic regression including gender, age, marital status, if  
44  
45 having any children or not, years of professional activity, number of hours of work per  
46  
47 week, number of hours in contact with patients per day, practice unit, and if working in  
48  
49 any other institution, was performed according to the different definitions of burnout.  
50  
51 Increased risk for burnout was obtained for people working in Personalized (odds of  
52  
53 3.62,  $P < 0.05$ ) relative to Family Health Care Units and also for increasing years of  
54  
55  
56  
57  
58  
59  
60

1  
2  
3 professional activity (odds of 1.69,  $P < 0.05$ ), when considering burnout as, respectively,  
4  
5 high EE and/or high DP or high score on EE in combination with high DP or low PA.  
6  
7

8  
9 In **table 3** it is evident that Portugal FDs are comparatively in a more favorable  
10 situation. Participants scoring at least high and at least average in one dimension were  
11 33.0% and 53.5%, respectively; and 31.1% scored exclusively low in each dimension  
12  
13 (see **table 2**).  
14  
15

## 16 17 18 19 **Discussion**

20  
21 To our knowledge, this is the first study ever to assess rates of burnout among  
22 FDs in Portugal. Our study also complements the previous findings of the EGPRN  
23 study[3], which assessed burnout among FDs from 12 European countries. The main  
24 finding is that in Portugal, in overall, FDs have low levels of burnout for the three  
25 subscales EE, DP and PA. In relation to each gender, men have higher symptoms of  
26 burnout, but since they are significantly older and have more years of professional  
27 activity than women, this might be an explanation for the different results.  
28  
29  
30  
31  
32  
33  
34  
35  
36  
37  
38

39  
40 The prevalence of burnout ranged from 2.0% to 27.7%, depending on the  
41 definition used. This wide range is due to the different combinations of EE, DP and PA  
42 subscales, as indicated in **figure 1** [8-12]. Hence, it would be of interest that studies on  
43 burnout report their results using one or several definitions, or as suggested in figure  
44 1, in order to facilitate comparisons with the literature. Finally, if burnout is considered  
45 as a continuous process, the majority of FDs is at risk, although with different grades of  
46 risk (between 41.2% - 66.9%, considering the previous definitions of burnout and  
47 excluding those who have low burnout symptoms in the three subscales), as shown in  
48  
49  
50  
51  
52  
53  
54  
55  
56  
57  
58  
59  
60

1  
2  
3 **table 2.** The Portuguese FDs had lower burnout scores than FDs from other European  
4 countries (see **table 3**). A possible explanation might be related to a slightly lower  
5 workload among Portuguese FDs compared to their colleagues from other countries.  
6  
7 For instance, Portugal has 198.3 FDs per 100,000 inhabitants, a much higher number in  
8 comparison with the United Kingdom, which has only 78.3 FDs per 100,000[13].  
9  
10 Further, a Portuguese FD has on average 1500[14] patients, again a value lower than in  
11 the UK (1800)[15]. Another possible explanation is that Portuguese FDs consider their  
12 job as very demanding, but very rewarding at the same time, as reflected by a lower  
13 prevalence of bad PA among men who have higher levels of EE and DP, in comparison  
14 to women, and also, by increasing significant ( $P < 0.05$ ) PA scores with increasing  
15 working hours per day (not shown – supplementary table 1 for reviewing purposes  
16 only). Still, further studies are advisable to better understand the low burnout  
17 prevalence and scores among Portuguese doctors relative to their European  
18 counterparts.  
19  
20  
21  
22  
23  
24  
25  
26  
27  
28  
29  
30  
31  
32  
33  
34  
35  
36

37 This study has some limitations worth noting. First the response rate (41%) was  
38 rather low, but identical to the one reported by the EGPRN study[3]. The questionnaire  
39 MBI hadn't been validated in Portugal at the time of the study; still, Cronbach's  $\alpha$   
40 values ranged between 0.64 (for DP) and 0.90 (for EE), also in agreement with those  
41 reported in the EGPRN study[3]. Finally, only FDs present at the HCCs answered, thus  
42 excluding those on sick leave; hence, it is possible that the burnout rates reported are  
43 underestimated. Still, in the absence of other studies available, our results provide the  
44 first estimation of the burnout rates among FDs in Portugal. The results of our study  
45 have important implications. In Portugal, there is currently no aid for dealing with  
46  
47  
48  
49  
50  
51  
52  
53  
54  
55  
56  
57  
58  
59  
60

1  
2  
3 burnout among health professionals. Hence, it would be of uttermost importance that  
4  
5 the Portuguese Ministry of Health, the Portuguese College of Physicians or the  
6  
7 Regional Health Administrations provide some support at institutional and individual  
8  
9 levels. Finally, another study would be desirable to assess the progression of burnout  
10  
11 among Portuguese FDs.  
12  
13

14  
15 In summary, our results suggest that a significant percentage of Portuguese FD  
16  
17 present with burnout. These values are nevertheless lower than reported in other  
18  
19 European countries.  
20  
21

## 22 23 24 25 26 **Acknowledgements** 27

28  
29 We would like to deeply thank the doctors, nurses and secretaries employed in  
30  
31 the following HCs: Aljezur, Alvalade, Barcelos, Benfica, Borba, Castro Daire, Celorico de  
32  
33 Bastos, Coruche, Crato, Elvas, Foz do Douro, Francisco Jardim, Gouveia, Grândola,  
34  
35 Guarda, Ílhavo, Jardim do Mar, Lousã, Mangualde, Marco Canaveses, Marinha grande,  
36  
37 Mação, Miranda do Douro, Moita, Odemira, Paredes de Coura, Penamacor, Peso da  
38  
39 Régua, Pombal, Ponte da Barca, Proença-a-Nova, Ribeira Grande, Santa Cruz da  
40  
41 Graciosa, Tavira, Vagos, Viana do Alentejo, Vidigueira, Vila Nova Poiares, Vila Pouca de  
42  
43 Aguiar and Vimioso.  
44  
45  
46  
47  
48  
49  
50  
51  
52  
53  
54  
55  
56  
57  
58  
59  
60



**Table 1** – Main characteristics of the participants.

| Variables                              | All                      | Male                   | Female                  | Test                 |
|----------------------------------------|--------------------------|------------------------|-------------------------|----------------------|
| Age                                    | 54.5 [9.0]<br>(n = 148)  | 55.0 [5.0]<br>(n = 67) | 53.0 [13.0]<br>(n = 81) | 1813.0***            |
| Years of professional activity         | 29.0 [10.3]<br>(n = 150) | 30.0 [4.0]<br>(n = 67) | 28.0 [5.0]<br>(n = 83)  | 2103.0*              |
| Hours of work per week                 | 42.0 [3.0]<br>(n = 150)  | 42.0 [3.4]<br>(n = 68) | 42.0 [2.0]<br>(n = 82)  | 2744.0 <sup>ns</sup> |
| Hours of contact with patients per day | 7.0 [1.5]<br>(n = 138)   | 7.0 [1.6]<br>(n = 61)  | 7.0 [1.6]<br>(n = 77)   | 2201.0 <sup>ns</sup> |
| Emotional exhaustion score             | 16.0 [19.0]              | 17.0 [22.0]            | 14.5 [16.3]             | 2584.5 <sup>ns</sup> |
| High emotional exhaustion score        | 38 (25.3)<br>(n = 150)   | 21 (30.9)<br>(n = 68)  | 17 (20.7)<br>(n = 82)   | 2.08 <sup>ns</sup>   |
| Depersonalization score                | 4.0 [5.0]                | 6.0 [6.8]              | 3.0 [5.8]               | 2078.0*              |
| High depersonalization score           | 15 (10.1)<br>(n = 148)   | 10 (14.7)<br>(n = 68)  | 5 (6.3)<br>(n = 80)     | 3.52 <sup>ns</sup>   |
| Personal Accomplishment score          | 41.0 [8.0]               | 42.5 [8.0]             | 40.0 [8.0]              | 2206.0*              |
| Low personal accomplishment score      | 18 (12.0)<br>(n = 150)   | 6 (8.8)<br>(n = 68)    | 12 (14.6)<br>(n = 82)   | 4.28 <sup>ns</sup>   |
| Burnout <sup>§</sup>                   | 3 (2.0)<br>(n = 148)     | 2 (2.9)<br>(n = 68)    | 1 (1.3)<br>(n = 80)     | NA                   |
| Burnout <sup>§§</sup>                  | 41 (27.7)<br>(n = 148)   | 22 (32.4)<br>(n = 68)  | 19 (23.8)<br>(n = 80)   | 1.36 <sup>ns</sup>   |
| Burnout <sup>§§§</sup>                 | 18 (12.2)<br>(n = 148)   | 9 (13.2)<br>(n = 68)   | 9 (11.3)<br>(n = 80)    | 0.14 <sup>ns</sup>   |

1  
2  
3 Results are expressed as median [interquartile interval] or number (percentage) of the  
4  
5 total subjects. Comparisons performed with Mann-Whitney nonparametric test for  
6  
7 quantitative data and by chi-square for qualitative data: NA, not accessible for  
8  
9 statistical analysis. NS, not significant. \*,  $p < 0.05$ . \*\*,  $p < 0.01$ , \*\*\*,  $p < 0.001$ . Burnout  
10  
11 defined as § high levels of EE and DP, combined with low PA; §§ high EE and/or high DP  
12  
13 and §§§ high score on EE in combination with high DP or low PA.  
14  
15  
16  
17  
18  
19  
20  
21  
22  
23  
24  
25  
26  
27  
28  
29  
30  
31  
32  
33  
34  
35  
36  
37  
38  
39  
40  
41  
42  
43  
44  
45  
46  
47  
48  
49  
50  
51  
52  
53  
54  
55  
56  
57  
58  
59  
60

**Table 2** – Number of participants with low, average and high burnout scores in none, one, two or three subscales.

|         |  | High Burnout |           |           |         |           |
|---------|--|--------------|-----------|-----------|---------|-----------|
|         |  | 0            | 1         | 2         | 3       | Total     |
| Average |  |              |           |           |         |           |
| burnout |  |              |           |           |         |           |
| 0       |  | 46 (31.1)    | 15 (10.1) | 5 (3.4)   | 3 (2.0) | 69 (46.6) |
| 1       |  | 39 (26.4)    | 14 (9.5)  | 10 (6.8)  | -       | 63 (42.6) |
| 2       |  | 12 (8.1)     | 2 (1.4)   | -         | -       | 14 (9.5)  |
| 3       |  | 2 (1.4)      | -         | -         | -       | 2 (1.4)   |
| Total   |  | 99 (66.9)    | 31 (20.9) | 15 (10.1) | 3 (2.0) | 148 (100) |

The possible combinations for the different subscales describing increasing burnout are shown in the table. Participants with low burnout scores in one dimension are represented by excluding average or high burnout. Results are expressed as number (percentage) of the total subjects.

**Table 3** – Results for each burnout subscale in previous and recent European studies.

| European Studies                                      | EE          | DP          | PA           |
|-------------------------------------------------------|-------------|-------------|--------------|
| EGPRN study, Overall<br>(2008, <i>n</i> = 1393)[3]    | 24.0 ± 16.0 | 7.0 ± 7.0   | 37 ± 11.0    |
| Spanish FDs <sup>1</sup><br>(2005, <i>n</i> = 86)[16] | 27.4 ± 11.8 | 10.07 ± 6.4 | 35.9 ± 10.07 |
| Swiss FDs<br>(2002, <i>n</i> = 1755)[17]              | 17.9 ± 9.8  | 6.5 ± 4.7   | 39.6 ± 6.5   |
| EGPRN study<br>(2008)[3]                              | High EE (%) | High DP (%) | Low PA (%)   |
| Overall<br>( <i>n</i> = 1393)                         | 43.0        | 35.3        | 32.0         |
| Bulgaria<br>( <i>n</i> = 69)                          | 62.3        | 30.4        | 18.8         |
| Croatia<br>( <i>n</i> = 117)                          | 41.9        | 12.0        | 13.7         |
| France<br>( <i>n</i> = 178)                           | 33.7        | 35.4        | 27.5         |
| Greece<br>( <i>n</i> = 45)                            | 31.8        | 73.3        | 93.2         |
| Hungary<br>( <i>n</i> = 87)                           | 36.8        | 35.6        | 26.4         |
| Italy<br>( <i>n</i> = 147)                            | 68.0        | 55.1        | 40.8         |
| Malta<br>( <i>n</i> = 129)                            | 36.4        | 31.0        | 24.8         |
| Poland<br>( <i>n</i> = 150)                           | 48.0        | 34.0        | 30.0         |
| Spain<br>( <i>n</i> = 86)                             | 30.2        | 34.9        | 25.6         |
| Sweden<br>( <i>n</i> = 109)                           | 45.9        | 34.9        | 11.9         |
| Turkey<br>( <i>n</i> = 112)                           | 15.2        | 15.2        | 69.4         |
| England (UK)<br>( <i>n</i> = 164)                     | 54.3        | 44.5        | 32.9         |
| <b>Portugal (this study)<br/>(<i>n</i> = 150)</b>     | 25.3        | 10.0        | 12.0         |

Results are expressed as mean ± standard deviation or percentage. FD, family doctor. EE,

Emotional Exhaustion; DP, Depersonalization; PA, Personal Accomplishment. 1. Corresponds to

the year of publication, not to the time of survey.

**Supplementary table 1** - Burnout mean scores according to selected participants' characteristics.

|                          | Emotional Exhaustion | <i>Test</i>          | Depersonalization | <i>Test</i>          | Personal Accomplishment | <i>Test</i>          |
|--------------------------|----------------------|----------------------|-------------------|----------------------|-------------------------|----------------------|
| <b>Gender</b>            |                      |                      |                   |                      |                         |                      |
| Male                     | 19.7 ± 13.1          | 2584.5 <sup>ns</sup> | 6.6 ± 4.7         | <b>2078.0*</b>       | 40.5 ± 7.1              | <b>2206.0*</b>       |
| Female                   | 17.7 ± 12.1          |                      | 4.7 ± 4.8         |                      | 38.5 ± 7.4              |                      |
| <b>Age</b>               |                      |                      |                   |                      |                         |                      |
| ≤45                      | 16.5 ± 11.6          | 1596.0 <sup>ns</sup> | 4.8 ± 3.6         | 1713.5 <sup>ns</sup> | 40.1 ± 4.4              | 1704.0 <sup>ns</sup> |
| >45                      | 19.1 ± 12.8          |                      | 5.8 ± 5.7         |                      | 39.4 ± 7.9              |                      |
| <b>Children</b>          |                      |                      |                   |                      |                         |                      |
| Yes                      | 19.0 ± 12.5          | 801.0 <sup>ns</sup>  | 5.8 ± 5.2         | <b>678.0*</b>        | 39.7 ± 7.0              | 794.5 <sup>ns</sup>  |
| No                       | 15.2 ± 12.9          |                      | 3.9 ± 5.9         |                      | 36.6 ± 9.8              |                      |
| <b>Marital status</b>    |                      |                      |                   |                      |                         |                      |
| Single/Divorced          | 14.9 ± 12.6          | <b>1452.0*</b>       | 4.6 ± 5.8         | 1479.0 <sup>ns</sup> | 39.6 ± 8.5              | 1786.5 <sup>ns</sup> |
| Married/Union            | 19.6 ± 12.4          |                      | 5.8 ± 5.0         |                      | 39.4 ± 7.1              |                      |
| <b>Practice years</b>    |                      |                      |                   |                      |                         |                      |
| ≤20                      | 15.9 ± 11.1          | 1688.5 <sup>ns</sup> | 4.6 ± 3.5         | 1879.5 <sup>ns</sup> | 39.9 ± 4.6              | 1912.5 <sup>ns</sup> |
| >20                      | 19.6 ± 12.9          |                      | 5.9 ± 5.7         |                      | 39.2 ± 8.0              |                      |
| <b>Hours/day patien.</b> |                      |                      |                   |                      |                         |                      |
| ≤5                       | 17.4 ± 7.8           |                      | 5.1 ± 4.1         |                      | 30.8 ± 11.5             |                      |
| 6-8                      | 19.2 ± 13.2          | 0.7 <sup>ns</sup>    | 5.8 ± 5.5         | 3.3 <sup>ns</sup>    | 39.6 ± 6.9              | <b>6.1 *</b>         |
| ≥9                       | 23.1 ± 13.4          |                      | 9.1 ± 5.9         |                      | 36.6 ± 8.6              |                      |
| <b>Hours/week inst.</b>  |                      |                      |                   |                      |                         |                      |
| ≤40                      | 17.9 ± 13.7          | 2368.5 <sup>ns</sup> | 5.4 ± 5.8         | 2234.5 <sup>ns</sup> | 39.5 ± 8.8              | 2356.5 <sup>ns</sup> |
| >40                      | 19.3 ± 11.7          |                      | 5.8 ± 4.9         |                      | 39.3 ± 6.2              |                      |
| <b>Practice unit</b>     |                      |                      |                   |                      |                         |                      |
| FHCU                     | 16.1 ± 10.8          | 1701.0 <sup>ns</sup> | 5.3 ± 4.6         | 1915.5 <sup>ns</sup> | 41.0 ± 5.7              | 1663.5 <sup>ns</sup> |
| PHCU                     | 19.4 ± 12.9          |                      | 5.6 ± 5.1         |                      | 38.8 ± 7.8              |                      |
| <b>Other inst.</b>       |                      |                      |                   |                      |                         |                      |
| Yes                      | 16.8 ± 12.0          | 2174.0 <sup>ns</sup> | 5.5 ± 5.3         | 2211.5 <sup>ns</sup> | 40.2 ± 7.1              | 2237.5 <sup>ns</sup> |
| No                       | 19.3 ± 12.9          |                      | 5.6 ± 5.3         |                      | 39.0 ± 7.6              |                      |

Results are expressed as mean ± standard deviation. Comparisons were performed with Mann-

Whitney or Kruskal-Wallis: NS, not significant. \*, p <0.05. FHCU, Family Health Care Unit.

PHCU, Personalized Health Care Unit.

## Bibliography

1. Devi S. Doctors in distress. *Lancet*, 2011;377:454-5
2. Web page: Monn MA. Mindfulness Program Staves Off Primary Care Burnout, in *Family Practice News*, 2009
3. Soler JK, Yaman H, Esteva M, et al. Burnout in European Family Doctors: the EGPRN study. *Fam Pract* 2008;25:245-65
4. Delbrouck M. Síndrome de Exaustão (Burnout). 2006, Climepsi ed.
5. de Valk M, Oostrom C. Burnout in the medical profession - causes, consequences and solutions. *Occupational Health at Work* 2007;3
6. Portuguese Ministry of Health. Portal da Saúde. 2010; Available from: <http://www.portaldasaude.pt/portal>
7. Maslach C, Jackson S. MBI-Human Services Survey. Available from: <http://www.mindgarden.com/products/mbi.htm>
8. Maslach C. Personal communication. September 24, 2008
9. Legassie J, Zibrowski EM, Goldszmidt MA. Measuring resident well-being: impostorism and burnout syndrome in residency. *J Gen Intern Med* 2008; 23:1090-4
10. Schaufeli W, Bakker A, Hoogduin K, et al. On the clinical validity of the Maslach burnout inventory and the burnout measure. *Psychol Health* 2001;16:565-82
11. Thomas NK. Resident Burnout. *JAMA* 2004;292:2880-2889
12. Brenninkmeijer V, VanYperen N. How to conduct research on burnout: advantages and disadvantages of a unidimensional approach in burnout research. *Occup Environ Med*, 2003;60:i16-i20
13. World Health Organisation. European health for all database. 2010; Available from: <http://data.euro.who.int/hfad/>
14. Web page: Portugal: The healthcare system. Available from: <http://www.uemo.eu/gp-in-europe/86-portugal.html>
15. Web page: General Practitioners in the UK. Available from: <http://www.rxpgonline.com/article1292.html>
16. Esteva M, Larraz C, Soler J, et al. Burn-out in Spanish general practitioners *Aten Primaria* 2005;35:108-9
17. Goehring C, Bouvier Gallacchi M, Künzi B, et al. Psychosocial and professional characteristics of burnout in Swiss primary care practitioners: a cross-sectional survey. *Swiss Med Wkly* 2005;135:101-108

STROBE 2007 (v4) Statement—Checklist of items that should be included in reports of *cross-sectional studies*

| Section/Topic            | Item # | Recommendation                                                                                                                                                                       | Reported on page # |
|--------------------------|--------|--------------------------------------------------------------------------------------------------------------------------------------------------------------------------------------|--------------------|
| Title and abstract       | 1      | (a) Indicate the study's design with a commonly used term in the title or the abstract                                                                                               | Page 1             |
|                          |        | (b) Provide in the abstract an informative and balanced summary of what was done and what was found                                                                                  | Pages 3-4          |
| <b>Introduction</b>      |        |                                                                                                                                                                                      |                    |
| Background/rationale     | 2      | Explain the scientific background and rationale for the investigation being reported                                                                                                 | Page 5             |
| Objectives               | 3      | State specific objectives, including any prespecified hypotheses                                                                                                                     | Page 5             |
| <b>Methods</b>           |        |                                                                                                                                                                                      |                    |
| Study design             | 4      | Present key elements of study design early in the paper                                                                                                                              | Page 5             |
| Setting                  | 5      | Describe the setting, locations, and relevant dates, including periods of recruitment, exposure, follow-up, and data collection                                                      | Page 5             |
| Participants             | 6      | (a) Give the eligibility criteria, and the sources and methods of selection of participants                                                                                          | Pages 5-6          |
| Variables                | 7      | Clearly define all outcomes, exposures, predictors, potential confounders, and effect modifiers. Give diagnostic criteria, if applicable                                             | Page 6             |
| Data sources/measurement | 8*     | For each variable of interest, give sources of data and details of methods of assessment (measurement). Describe comparability of assessment methods if there is more than one group | Page 6             |
| Bias                     | 9      | Describe any efforts to address potential sources of bias                                                                                                                            | Page 6             |

|                        |     |                                                                                                                                                                                                              |           |
|------------------------|-----|--------------------------------------------------------------------------------------------------------------------------------------------------------------------------------------------------------------|-----------|
| Study size             | 10  | Explain how the study size was arrived at                                                                                                                                                                    | Page 5-6  |
| Quantitative variables | 11  | Explain how quantitative variables were handled in the analyses. If applicable, describe which groupings were chosen and why                                                                                 | Page 6    |
| Statistical methods    | 12  | (a) Describe all statistical methods, including those used to control for confounding                                                                                                                        | Page 6    |
|                        |     | (b) Describe any methods used to examine subgroups and interactions                                                                                                                                          | Page 6    |
|                        |     | (c) Explain how missing data were addressed                                                                                                                                                                  | Pages 6-7 |
|                        |     | (d) If applicable, describe analytical methods taking account of sampling strategy                                                                                                                           |           |
|                        |     | (e) Describe any sensitivity analyses                                                                                                                                                                        |           |
| <b>Results</b>         |     |                                                                                                                                                                                                              |           |
| Participants           | 13* | (a) Report numbers of individuals at each stage of study—eg numbers potentially eligible, examined for eligibility, confirmed eligible, included in the study, completing follow-up, and analysed            |           |
|                        |     | (b) Give reasons for non-participation at each stage                                                                                                                                                         |           |
|                        |     | (c) Consider use of a flow diagram                                                                                                                                                                           |           |
| Descriptive data       | 14* | (a) Give characteristics of study participants (eg demographic, clinical, social) and information on exposures and potential confounders                                                                     |           |
|                        |     | (b) Indicate number of participants with missing data for each variable of interest                                                                                                                          |           |
| Outcome data           | 15* | Report numbers of outcome events or summary measures                                                                                                                                                         |           |
| Main results           | 16  | (a) Give unadjusted estimates and, if applicable, confounder-adjusted estimates and their precision (eg, 95% confidence interval). Make clear which confounders were adjusted for and why they were included | Pages 8-9 |
|                        |     | (b) Report category boundaries when continuous variables were categorized                                                                                                                                    |           |
|                        |     | (c) If relevant, consider translating estimates of relative risk into absolute risk for a meaningful time period                                                                                             |           |



1  
2  
3  
4  
5  
6  
7  
8  
9  
10  
11  
12  
13  
14  
15  
16  
17  
18  
19  
20  
21  
22  
23  
24  
25  
26  
27  
28  
29  
30  
31  
32  
33  
34  
35  
36  
37  
38  
39  
40  
41  
42  
43  
44  
45  
46  
47  
48  
49

|                          |    |                                                                                                                                                                            |            |
|--------------------------|----|----------------------------------------------------------------------------------------------------------------------------------------------------------------------------|------------|
| Other analyses           | 17 | Report other analyses done—eg analyses of subgroups and interactions, and sensitivity analyses                                                                             | Page 9     |
| <b>Discussion</b>        |    |                                                                                                                                                                            |            |
| Key results              | 18 | Summarise key results with reference to study objectives                                                                                                                   | Page 10    |
| Limitations              | 19 | Discuss limitations of the study, taking into account sources of potential bias or imprecision. Discuss both direction and magnitude of any potential bias                 | Page 9     |
| Interpretation           | 20 | Give a cautious overall interpretation of results considering objectives, limitations, multiplicity of analyses, results from similar studies, and other relevant evidence | Pages 8-9  |
| Generalisability         | 21 | Discuss the generalisability (external validity) of the study results                                                                                                      | Pages 9-10 |
| <b>Other information</b> |    |                                                                                                                                                                            |            |
| Funding                  | 22 | Give the source of funding and the role of the funders for the present study and, if applicable, for the original study on which the present article is based              |            |

\*Give information separately for cases and controls in case-control studies and, if applicable, for exposed and unexposed groups in cohort and cross-sectional studies.

**Note:** An Explanation and Elaboration article discusses each checklist item and gives methodological background and published examples of transparent reporting. The STROBE checklist is best used in conjunction with this article (freely available on the Web sites of PLoS Medicine at <http://www.plosmedicine.org/>, Annals of Internal Medicine at <http://www.annals.org/>, and Epidemiology at <http://www.epidem.com/>). Information on the STROBE Initiative is available at [www.strobe-statement.org](http://www.strobe-statement.org).

**Supplementary table 1:** Burnout mean scores according to selected participants' characteristics.

|                          | Emotional Exhaustion | <i>Test</i>          | Depersonalization | <i>Test</i>          | Personal Accomplishment | <i>Test</i>          |
|--------------------------|----------------------|----------------------|-------------------|----------------------|-------------------------|----------------------|
| <b>Gender</b>            |                      |                      |                   |                      |                         |                      |
| Male                     | 19.7 ± 13.1          | 2584.5 <sup>ns</sup> | 6.6 ± 4.7         | <b>2078.0*</b>       | 40.5 ± 7.1              | <b>2206.0*</b>       |
| Female                   | 17.7 ± 12.1          |                      | 4.7 ± 4.8         |                      | 38.5 ± 7.4              |                      |
| <b>Age</b>               |                      |                      |                   |                      |                         |                      |
| ≤45                      | 16.5 ± 11.6          | 1596.0 <sup>ns</sup> | 4.8 ± 3.6         | 1713.5 <sup>ns</sup> | 40.1 ± 4.4              | 1704.0 <sup>ns</sup> |
| >45                      | 19.1 ± 12.8          |                      | 5.8 ± 5.7         |                      | 39.4 ± 7.9              |                      |
| <b>Children</b>          |                      |                      |                   |                      |                         |                      |
| Yes                      | 19.0 ± 12.5          | 801.0 <sup>ns</sup>  | 5.8 ± 5.2         | <b>678.0*</b>        | 39.7 ± 7.0              | 794.5 <sup>ns</sup>  |
| No                       | 15.2 ± 12.9          |                      | 3.9 ± 5.9         |                      | 36.6 ± 9.8              |                      |
| <b>Marital status</b>    |                      |                      |                   |                      |                         |                      |
| Single/Divorced          | 14.9 ± 12.6          | <b>1452.0*</b>       | 4.6 ± 5.8         | 1479.0 <sup>ns</sup> | 39.6 ± 8.5              | 1786.5 <sup>ns</sup> |
| Married/Union            | 19.6 ± 12.4          |                      | 5.8 ± 5.0         |                      | 39.4 ± 7.1              |                      |
| <b>Practice years</b>    |                      |                      |                   |                      |                         |                      |
| ≤20                      | 15.9 ± 11.1          | 1688.5 <sup>ns</sup> | 4.6 ± 3.5         | 1879.5 <sup>ns</sup> | 39.9 ± 4.6              | 1912.5 <sup>ns</sup> |
| >20                      | 19.6 ± 12.9          |                      | 5.9 ± 5.7         |                      | 39.2 ± 8.0              |                      |
| <b>Hours/day patien.</b> |                      |                      |                   |                      |                         |                      |
| ≤5                       | 17.4 ± 7.8           |                      | 5.1 ± 4.1         |                      | 30.8 ± 11.5             |                      |
| 6-8                      | 19.2 ± 13.2          | 0.7 <sup>ns</sup>    | 5.8 ± 5.5         | 3.3 <sup>ns</sup>    | 39.6 ± 6.9              | <b>6.1 *</b>         |
| ≥9                       | 23.1 ± 13.4          |                      | 9.1 ± 5.9         |                      | 36.6 ± 8.6              |                      |
| <b>Hours/week inst.</b>  |                      |                      |                   |                      |                         |                      |
| ≤40                      | 17.9 ± 13.7          | 2368.5 <sup>ns</sup> | 5.4 ± 5.8         | 2234.5 <sup>ns</sup> | 39.5 ± 8.8              | 2356.5 <sup>ns</sup> |
| >40                      | 19.3 ± 11.7          |                      | 5.8 ± 4.9         |                      | 39.3 ± 6.2              |                      |
| <b>Practice unit</b>     |                      |                      |                   |                      |                         |                      |
| FHCU                     | 16.1 ± 10.8          | 1701.0 <sup>ns</sup> | 5.3 ± 4.6         | 1915.5 <sup>ns</sup> | 41.0 ± 5.7              | 1663.5 <sup>ns</sup> |
| PHCU                     | 19.4 ± 12.9          |                      | 5.6 ± 5.1         |                      | 38.8 ± 7.8              |                      |
| <b>Other inst.</b>       |                      |                      |                   |                      |                         |                      |
| Yes                      | 16.8 ± 12.0          | 2174.0 <sup>ns</sup> | 5.5 ± 5.3         | 2211.5 <sup>ns</sup> | 40.2 ± 7.1              | 2237.5 <sup>ns</sup> |
| No                       | 19.3 ± 12.9          |                      | 5.6 ± 5.3         |                      | 39.0 ± 7.6              |                      |

Results are expressed as mean ± standard deviation. Comparisons were performed with Mann-Whitney or Kruskal-Wallis: NS, not significant. \*, p <0.05. FHCU, Family Health Care Unit. PHCU, Personalized Health Care Unit.

1  
2  
3  
4  
5  
6  
7  
8  
9  
10  
11  
12  
13  
14  
15  
16  
17  
18  
19  
20  
21  
22  
23  
24  
25  
26  
27  
28  
29  
30  
31  
32  
33  
34  
35  
36  
37  
38  
39  
40  
41  
42  
43  
44  
45  
46  
47  
48  
49

**Supplementary table 2:** logistic regression to assess the factors individually and independently associated with burnout components.

|                          | High EE           | High DP           | Low PA (1)        | Low PA (2)        |
|--------------------------|-------------------|-------------------|-------------------|-------------------|
| <b>Gender</b>            |                   |                   |                   |                   |
| <b>Woman</b>             | 1 (ref.)          | 1 (ref.)          | 1 (ref.)          | 1 (ref.)          |
| <b>Man</b>               | 1.45 (0.63-3.35)  | 2.06 (0.79-5.39)  | 0.40 (0.14-1.14)  | 0.33 (0.12-0.95)  |
| <b>Marital status</b>    |                   |                   |                   |                   |
| Single/Divorced          | 1 (ref.)          | 1 (ref.)          | -                 | -                 |
| Married/Union            | 3.06 (0.84-11.19) | 2.88 (0.62-13.29) | -                 | -                 |
| <b>Age category</b>      |                   |                   |                   |                   |
| ≤45                      | -                 | -                 | 1 (ref.)          | -                 |
| >45                      | -                 | -                 | 3.02 (0.82-11.17) | -                 |
| <b>Years of activity</b> |                   |                   |                   |                   |
| ≤20                      | -                 | 1 (ref.)          | -                 | 1 (ref.)          |
| >20                      | -                 | 1.78 (0.47-6.67)  | -                 | 3.07 (0.81-11.67) |
| <b>Practice unit</b>     |                   |                   |                   |                   |
| FHCU                     | 1 (ref.)          | -                 | 1 (ref.)          | 1 (ref.)          |
| PHCU                     | 2.48 (0.92-6.71)  | -                 | 3.31 (0.70-15.74) | 2.63 (0.81-8.55)  |

EE, emotional exhaustion; DP, depersonalization; PA, personal accomplishment; FHCU, Family Health Care Unit; PHCU, Personalized Health Care Unit; -, not included in the model. Results are expressed as Odds ratio and (95% confidence interval). For low PA, two models were used as the variables years of activity and age categories were correlated and their simultaneous inclusion led to a non-estimable model. Statistical analysis by multivariate logistic regression not taking into account sample stratification.

**Supplementary table 3:** Prevalence of burnout among Portuguese general practitioners, using original cut-offs for the Maslach Burnout Inventory – Human Services Survey (MBI-HSS)

| Variables                         | All                    | Male                  | Female                | Test               |
|-----------------------------------|------------------------|-----------------------|-----------------------|--------------------|
| High emotional exhaustion score   | 38 (25.3)<br>(n = 150) | 21 (30.9)<br>(n = 68) | 17 (20.7)<br>(n = 82) | 2.08 <sup>ns</sup> |
| High depersonalization score      | 38 (25.3)<br>(n = 150) | 21 (30.9)<br>(n = 68) | 17 (20.7)<br>(n = 82) | 2.08 <sup>ns</sup> |
| Low personal accomplishment score | 18 (12.0)<br>(n = 150) | 6 (8.8)<br>(n = 68)   | 12 (14.6)<br>(n = 82) | 4.28 <sup>ns</sup> |
| Burnout <sup>§</sup>              | 3 (2.0)<br>(n = 148)   | 2 (2.9)<br>(n = 68)   | 1 (1.3)<br>(n = 80)   | NA                 |
| Burnout <sup>§§</sup>             | 41 (27.7)<br>(n = 148) | 22 (32.4)<br>(n = 68) | 19 (23.8)<br>(n = 80) | 1.36 <sup>ns</sup> |
| Burnout <sup>§§§</sup>            | 18 (12.2)<br>(n = 148) | 9 (13.2)<br>(n = 68)  | 9 (11.3)<br>(n = 80)  | 0.14 <sup>ns</sup> |

Results are expressed as number of participants and (percentage). Statistical analysis by chi-square: ns, not significant, NA, not assessable. Burnout defined as § high levels of emotional exhaustion and depersonalization, combined with low personal accomplishment; §§ high emotional exhaustion and/or high depersonalization and §§§ high score on emotional exhaustion in combination with high depersonalization or low personal accomplishment.

**Supplementary table 4:** Number of participants with low, average and high burnout scores in none, one, two or three subscales, using original cut-offs for the Maslach Burnout Inventory – Human Services Survey (MBI-HSS)

|                 |           | High Burnout |           |         |           |       |
|-----------------|-----------|--------------|-----------|---------|-----------|-------|
|                 |           | 0            | 1         | 2       | 3         | Total |
| Average burnout |           |              |           |         |           |       |
| 0               | 46 (31.1) | 15 (10.1)    | 5 (3.4)   | 3 (2.0) | 69 (46.6) |       |
| 1               | 39 (26.4) | 14 (9.5)     | 10 (6.8)  | -       | 63 (42.6) |       |
| 2               | 12 (8.1)  | 2 (1.4)      | -         | -       | 14 (9.5)  |       |
| 3               | 2 (1.4)   | -            | -         | -       | 2 (1.4)   |       |
| Total           | 99 (66.9) | 31 (20.9)    | 15 (10.1) | 3 (2.0) | 148 (100) |       |

The possible combinations for the different subscales describing increasing burnout are shown in the table. Participants with low burnout scores in one dimension are represented by excluding average or high burnout. Results are expressed as number (percentage) of the total subjects.

**Supplementary figure 1** - Venn's diagram with the number of participants with high burnout scores in one, two or three subscales, using, original cut-offs for the Maslach Burnout Inventory – Human Services Survey (MBI-HSS). N = 150.

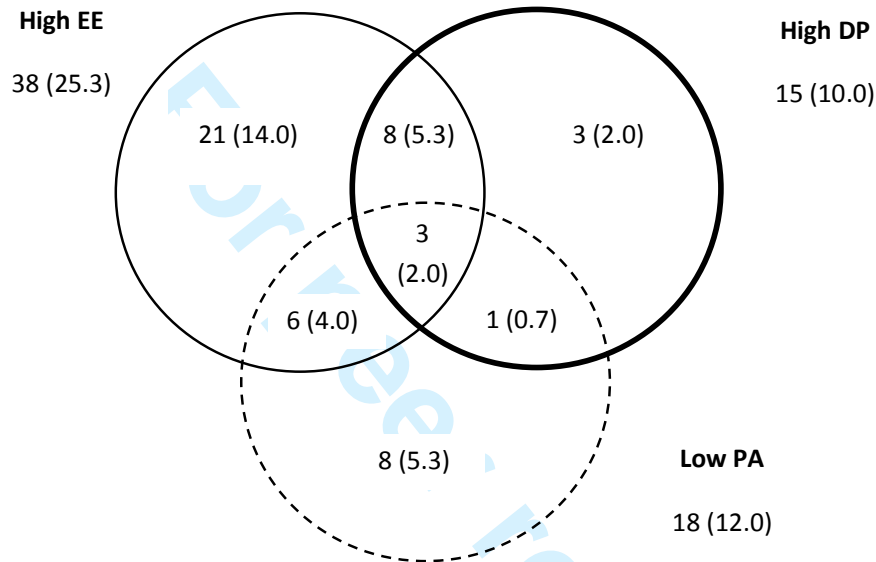

Results are expressed as number (percentage) of subjects.

1  
2  
3  
4  
5  
6  
7  
8  
9  
10  
11  
12  
13  
14  
15  
16  
17  
18  
19  
20  
21  
22  
23  
24  
25  
26  
27  
28  
29  
30  
31  
32  
33  
34  
35  
36  
37  
38  
39  
40  
41  
42  
43  
44  
45  
46  
47  
48  
49

**Figure 1** - Venn’s diagram with the number of participants with high burnout scores in one, two or three subscales, N = 150.

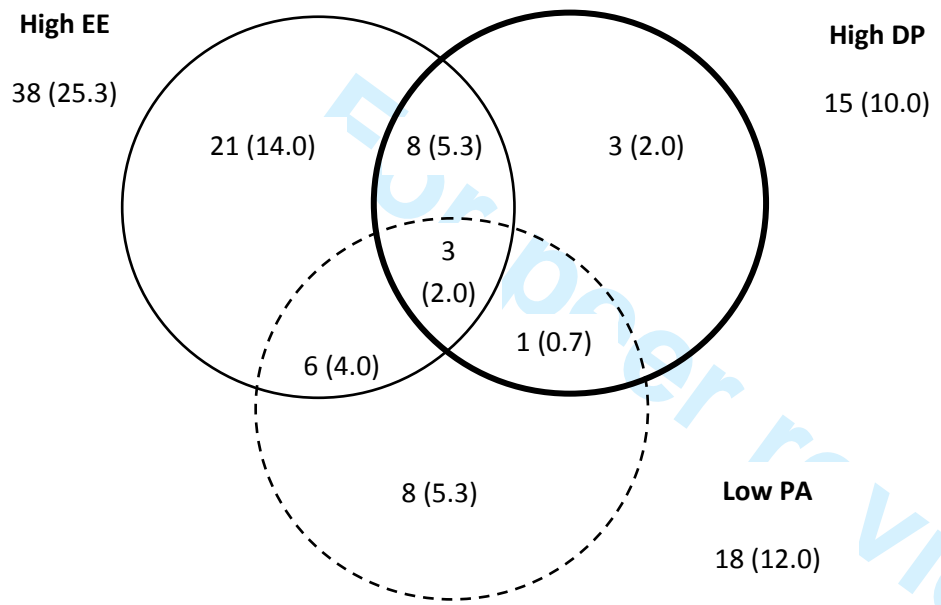

Results are expressed as number (percentage) of subjects.
